# Supplementary material
Source: PubMed Central journal article supplement (PMC3011944)
Supplement: NIHMS234974-supplement-01.pdf [file NIHMS234974-supplement-01.pdf]

## Supplemental Information

### 2-D DIGE LC-MS/MS Proteomic Analysis

Samples were processed and analyzed as described previously (1, 2). Briefly, discovery cohort CSF samples and a pooled reference sample were immunodepleted of six highly abundant proteins (albumin, IgG,  $\alpha$ 1-antitrypsin, IgA, haptoglobin, transferrin). Samples were randomly paired (CDR 0 and CDR 1), labeled with one of three cyanine dyes, and loaded with the labeled reference sample onto the same 2-D gel. Protein spot quantification and between-gel spot matching were performed on digitized images. To focus efforts on candidate biomarkers more likely to be measurable in the CSF of a majority of individuals, only gel features with significant intensity differences between CDR 0 and CDR 1 groups (Student's t-test,  $\alpha = 0.05$ ) that were present in >50% of gels were excised, trypsinized, and subjected to LC-MS/MS. Proteins were identified from peptide fragmentation spectra using MASCOT (v2.8, Matrix Sciences) and the NCBI non-redundant protein database (downloaded 11/11/2008).

**Table S1 A.** Utility of CSF Biomarkers In Predicting Conversion from CDR 0 to CDR>0

|                       | YKL-40/A $\beta$ 42 |           |                | tau/A $\beta$ 42 |            |                | ptau/A $\beta$ 42 |           |                |
|-----------------------|---------------------|-----------|----------------|------------------|------------|----------------|-------------------|-----------|----------------|
|                       | HR                  | 95% CI    | <i>p</i> value | HR               | 95% CI     | <i>p</i> value | HR                | 95% CI    | <i>p</i> value |
| Biomarker-continuous  | 1.78                | 1.31-2.44 | .0003          | 1.54             | 1.24-1.93  | .0001          | 1.61              | 1.28-2.02 | <.0001         |
| Age, yr               | 1.05                | 0.99-1.10 | .0844          | 1.07             | 1.01-1.12  | .0177          | 1.06              | 1.01-1.12 | .0181          |
| Women                 | 0.53                | 0.24-1.18 | .1196          | 0.50             | 0.22-1.14  | .1003          | 0.56              | 0.25-1.26 | .1596          |
|                       |                     |           |                |                  |            |                |                   |           |                |
|                       | YKL-40/A $\beta$ 42 |           |                | tau/A $\beta$ 42 |            |                | ptau/A $\beta$ 42 |           |                |
|                       | HR                  | 95% CI    | <i>p</i> value | HR               | 95% CI     | <i>p</i> value | HR                | 95% CI    | <i>p</i> value |
| Biomarker-categorical | 3.35                | 1.42-7.90 | .0057          | 5.76             | 2.35-14.09 | .0001          | 3.42              | 1.50-7.79 | .0035          |
| Age, yr               | 1.05                | 0.99-1.10 | .0950          | 1.07             | 1.02-1.13  | .0116          | 1.06              | 1.01-1.12 | .0194          |
| Women                 | 0.71                | 0.31-1.63 | .4181          | 0.66             | 0.29-1.49  | .3123          | 0.65              | 0.28-1.50 | .3110          |

**Table S1 B.** Utility of CSF Biomarkers In Predicting Progression from CDR 0.5 to CDR>0.5

|                       | YKL-40/A $\beta$ 42 |           |                | tau/A $\beta$ 42 |           |                | ptau/A $\beta$ 42 |            |                |
|-----------------------|---------------------|-----------|----------------|------------------|-----------|----------------|-------------------|------------|----------------|
|                       | HR                  | 95% CI    | <i>p</i> value | HR               | 95% CI    | <i>p</i> value | HR                | 95% CI     | <i>p</i> value |
| Biomarker-continuous  | 1.37                | 0.92-2.04 | .1171          | 1.45             | 1.07-1.97 | .0167          | 1.29              | 0.97-1.73  | .0803          |
| Age, yr               | 1.01                | 0.95-1.08 | .7218          | 1.01             | 0.95-1.07 | .8311          | 1.01              | 0.95-1.08  | .7509          |
| Women                 | 0.55                | 0.23-1.33 | .1837          | 0.51             | 0.21-1.24 | .1349          | 0.55              | 0.23-1.32  | .1797          |
|                       |                     |           |                |                  |           |                |                   |            |                |
|                       | YKL-40/A $\beta$ 42 |           |                | tau/A $\beta$ 42 |           |                | ptau/A $\beta$ 42 |            |                |
|                       | HR                  | 95% CI    | <i>p</i> value | HR               | 95% CI    | <i>p</i> value | HR                | 95% CI     | <i>p</i> value |
| Biomarker-categorical | 2.63                | 1.10-6.32 | .0305          | 3.64             | 1.51-8.80 | .0041          | 4.25              | 1.76-10.26 | .0013          |
| Age, yr               | 1.02                | 0.96-1.08 | .5786          | 1.02             | 0.96-1.09 | .4909          | 1.03              | 0.97-1.09  | .4241          |
| Women                 | 0.59                | 0.25-1.37 | .2157          | 0.50             | 0.21-1.21 | .1242          | 0.47              | 0.19-1.16  | .1000          |

**Table S1.** Cox proportional hazards models were used to assess the ability of CSF YKL-40/A $\beta$ 42, tau/A $\beta$ 42, and ptau/A $\beta$ 42 to predict **(A)** conversion from cognitive normalcy (CDR 0) to cognitive impairment (CDR>0) and **(B)** progression from very mild dementia (CDR 0.5) to mild or moderate dementia (CDR>0.5). Biomarker measures were analyzed as both continuous and

categorical variables, and were converted to standard Z-scores to allow comparison of hazard ratios between different biomarkers. In evaluating risk, “Biomarker” analyses (YKL-40/A $\beta$ 42, tau/A $\beta$ 42, ptau/A $\beta$ 42) were adjusted for age and gender. Likewise, analyses for “Age” were adjusted for biomarker and gender, and analyses for “Women” were adjusted for biomarker and age. HR, hazard ratio; CI, confidence interval.

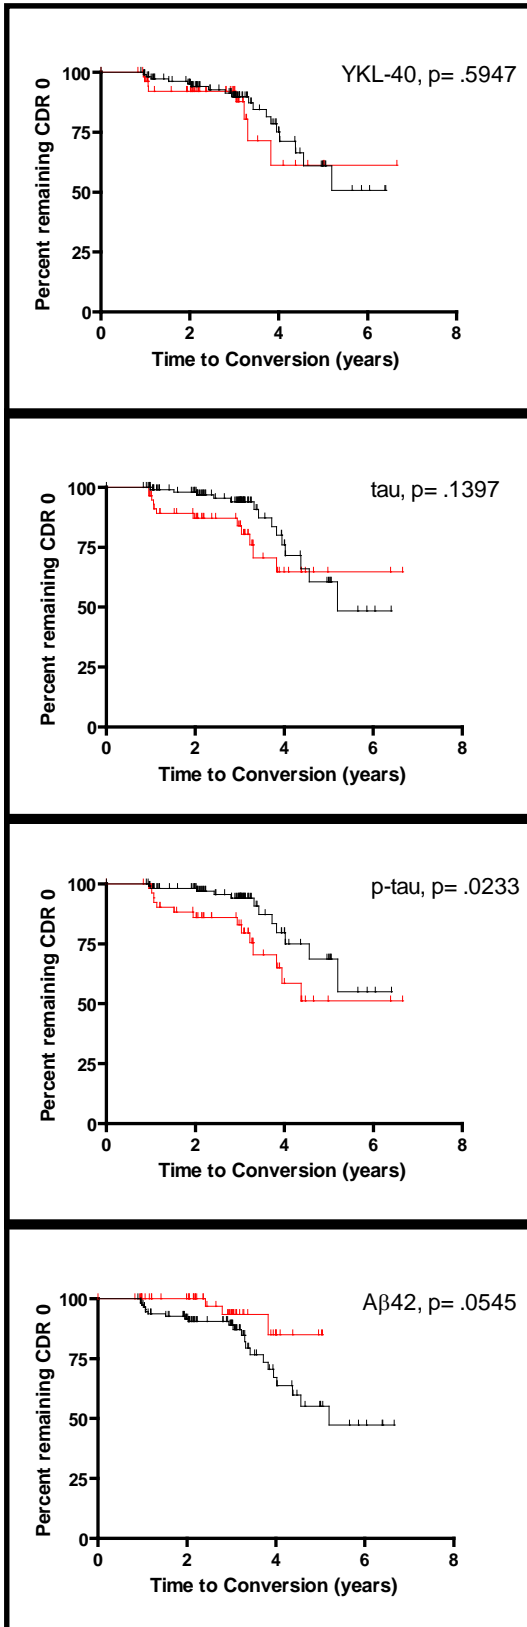

**Figure S1.** CSF YKL-40, tau, p-tau, and Aβ42 as predictors of conversion from CDR 0 to CDR>0. Kaplan-Meier estimates of rates of conversion are shown with red curves representing the upper tertile and black curves representing the lower two tertiles.

**Table S2.** Utility of CSF Biomarkers In Predicting Conversion from CDR 0 to CDR>0

|                      | YKL-40 |           |                | tau  |           |                | ptau |           |                | Aβ42 |           |                |
|----------------------|--------|-----------|----------------|------|-----------|----------------|------|-----------|----------------|------|-----------|----------------|
|                      | HR     | 95% CI    | <i>p</i> value | HR   | 95% CI    | <i>p</i> value | HR   | 95% CI    | <i>p</i> value | HR   | 95% CI    | <i>p</i> value |
| Biomarker-continuous | 0.95   | 0.61-1.47 | .8081          | 1.45 | 1.11-1.90 | .0072          | 1.47 | 1.14-1.91 | .0036          | 0.41 | 0.23-0.73 | .0021          |
| Age, yr              | 1.06   | 1.01-1.12 | .0211          | 1.07 | 1.01-1.12 | .0170          | 1.07 | 1.01-1.12 | .0148          | 1.05 | 1.00-1.10 | .0672          |
| Women                | 0.50   | 0.22-1.12 | .0919          | 0.50 | 0.22-1.12 | .0914          | 0.51 | 0.23-1.13 | .0981          | 0.50 | 0.23-1.12 | .0923          |

  

|                       | YKL-40 |           |                | tau  |           |                | ptau |           |                | Aβ42 |           |                |
|-----------------------|--------|-----------|----------------|------|-----------|----------------|------|-----------|----------------|------|-----------|----------------|
|                       | HR     | 95% CI    | <i>p</i> value | HR   | 95% CI    | <i>p</i> value | HR   | 95% CI    | <i>p</i> value | HR   | 95% CI    | <i>p</i> value |
| Biomarker-categorical | 1.00   | 0.42-2.33 | .9901          | 1.88 | 0.86-4.09 | .1114          | 2.69 | 1.22-5.93 | .0139          | 0.34 | 0.10-1.16 | .0841          |
| Age, yr               | 1.06   | 1.01-1.11 | .0225          | 1.06 | 1.01-1.12 | .0211          | 1.07 | 1.01-1.13 | .0105          | 1.05 | 1.00-1.11 | .0429          |
| Women                 | 0.51   | 0.23-1.13 | .0968          | 0.52 | 0.24-1.16 | .1097          | 0.55 | 0.25-1.23 | .1449          | 0.49 | 0.22-1.08 | .0754          |

**Table S2.** Cox proportional hazards models were used to assess the ability of CSF YKL-40, tau, ptau, and Aβ42 to predict conversion from cognitive normalcy (CDR 0) to cognitive impairment (CDR>0). Biomarker measures were analyzed as both continuous and categorical variables. In evaluating risk, “Biomarker” analyses (YKL-40, tau, ptau, Aβ42) were adjusted for age and gender. Likewise, analyses for “Age” were adjusted for biomarker and gender, and analyses for “Women” were adjusted for biomarker and age. HR, hazard ratio; CI, confidence interval.

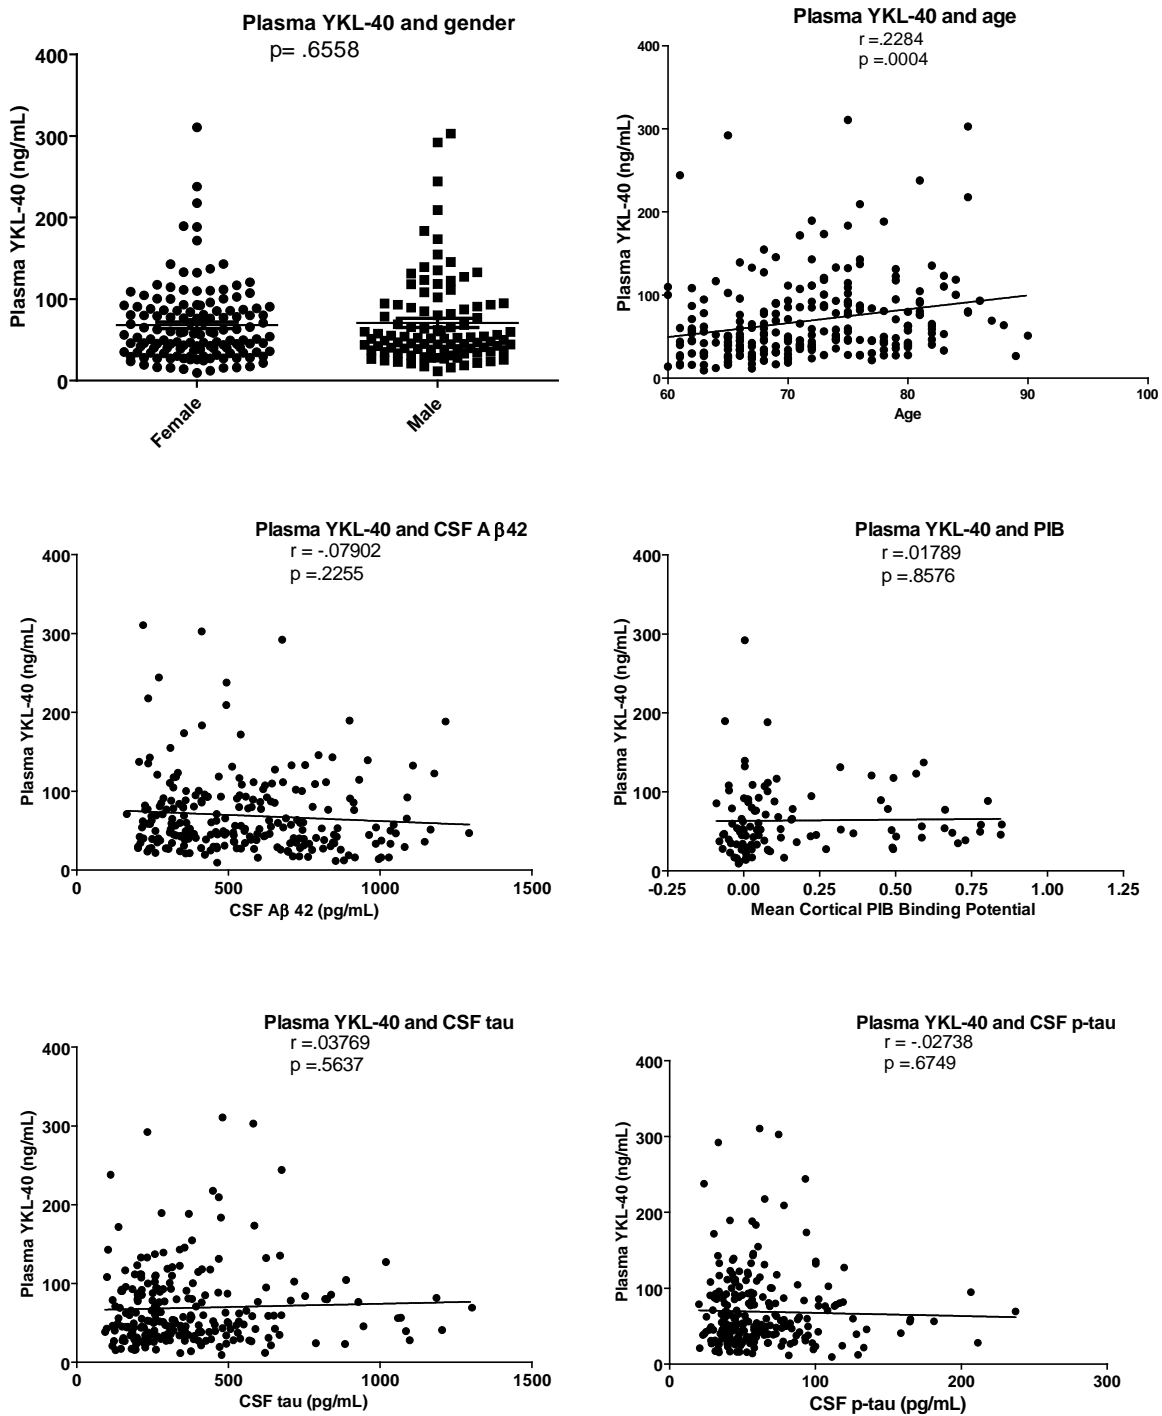

**Figure S2.** Plasma YKL-40 levels do not vary based on gender, but are correlated with age. Plasma YKL-40 levels are not correlated with other CSF biomarkers such as A $\beta$ 42, tau, p-tau181, or with mean cortical PIB binding potential.

1. Hu Y, Malone J, Fagan A, Townsend R, Holtzman D (2005): Comparative proteomic analysis of intra- and interindividual variation in human cerebrospinal fluid. *Mol & Cell Proteom.* 4:2000-2009.
2. Hu Y, Hosseini A, Kauwe J, Gross J, Cairns N, Goate A, *et al.* (2007): Identification and validation of novel CSF biomarkers for early stages of Alzheimer's disease. *Proteomics - Clin Appl.* 1:1373-1384.
